# Supplementary material for: Promotion of Pathological Cardiac Remodeling by Excessive Mitochondrial Fission in Sedentary Lifestyle-Associated Myocardial Infarction
Source: Research Square preprint supplement (doi:10.21203/rs.3.rs-6508918/v1), 2025-05-16
Supplement: Supplementary file 1 [file 772ca8647b634a858ebf9fb4.pdf]

**Promotion of Pathological Cardiac Remodeling by Excessive Mitochondrial Fission in Sedentary Lifestyle-Associated Myocardial Infarction**

Masashi Miyao<sup>a\*</sup>, Hikaru Oshima<sup>a</sup>, Chihiro Kawai<sup>a</sup>, Shota Furukawa<sup>a</sup>, Hirokazu Kotani<sup>b</sup>, Hirozo Minami<sup>a, c</sup>, Hitoshi Abiru<sup>a, c</sup>, Hideki Nagai<sup>a, c</sup>, Hiromu Yanagisawa<sup>d</sup>, Koh Ono<sup>d</sup>, Keiji Tamaki<sup>a</sup>, and Yoko Nishitani<sup>a</sup>

<sup>a</sup> *Department of Forensic Medicine, Kyoto University Graduate School of Medicine, Kyoto, Japan*

<sup>b</sup> *Department of Forensic Medicine and Sciences, Mie University Graduate School of Medicine, Tsu, Japan*

<sup>c</sup> *Center for Anatomical, Pathological, and Forensic Research at the Graduate School of Medicine, Kyoto University, Kyoto, Japan*

<sup>d</sup> *Department of Cardiovascular Medicine, Kyoto University Graduate School of Medicine, Kyoto, Japan*

**Corresponding Author:** Masashi Miyao (miyaom@fp.med.kyoto-u.ac.jp)

**Supplementary Table 1. RT-qPCR primers for analysis**

| Gene       | Direction | Sequence                |
|------------|-----------|-------------------------|
| GAPDH      | Forward   | AGGTCGGTGTGAACGGATTG    |
| GAPDH      | Reverse   | TGTAGACCATGTAGTTGAGGTCA |
| Beta actin | Forward   | CCACTGCCGCATCCTCTT      |
| Beta actin | Reverse   | TGGATGCCACAGGATTCCAT    |
| Anf        | Forward   | GTGTACAGTGCGGTGTCCAA    |
| Anf        | Reverse   | ACCTCATCTTCTACCGGATC    |
| Bnp        | Forward   | GCTGCTTTGGGCACAAGATAG   |
| Bnp        | Reverse   | GGAGCTCTTCCTACAACAACCTT |
| bMhc       | Forward   | AGGGCGACCTCAACGAGAT     |
| bMhc       | Reverse   | CAGCAGACTCTGGAGGCTCTT   |
| Col1a1     | Forward   | CACGGCTGTGTGCGATGA      |
| Col1a1     | Reverse   | TCGCCCTCCCGTCTTTG       |
| Col3α1     | Forward   | TCCCCTGGAATCTGTGAATC    |
| Col3α1     | Reverse   | TGAGTCGAATTGGGGAGAAT    |
| aSMA       | Forward   | CCAGAGCAAGAGAGGGATCCT   |
| aSMA       | Reverse   | TGTCGTCCCAGTTGGTGATG    |
| TNFα       | Forward   | CCCTCACACTCAGATCATCTTCT |
| TNFα       | Reverse   | GCTACGACGTGGGCTACAG     |
| IL-6       | Forward   | TAGTCCTTCCTACCCCAATTTCC |
| IL-6       | Reverse   | TTGGTCCTTAGCCACTCCTTC   |
| F4/80      | Forward   | CTCTGTGGTCCCACCTTCAT    |
| F4/80      | Reverse   | GATGGCCAAGGATCTGAAAA    |
| Col3α1     | Forward   | TCCCCTGGAATCTGTGAATC    |
| Col3α1     | Reverse   | TGAGTCGAATTGGGGAGAAT    |
| F4/80      | Forward   | CTCTGTGGTCCCACCTTCAT    |
| F4/80      | Reverse   | GATGGCCAAGGATCTGAAAA    |
| Vegfr2     | Forward   | CCTGGTAGAAGATTCAGGCATTG |
| Vegfr2     | Reverse   | CCTCACCCCTGCGGATAGTCA   |
| Pgc-1α     | Forward   | GACATGTGCAGCCAAGACTC    |
| Pgc-1α     | Reverse   | CTCAAATGGGGGAACCCTTGG   |
| Drp1       | Forward   | ATGCCAGCAAGTCCACAGAA    |
| Drp1       | Reverse   | TGTTCTCGGGCAGACAGTTT    |
| Mfn1       | Forward   | GCAGACAGCACATGGAGAGA    |
| Mfn1       | Reverse   | GATCCGATTCCGAGCTTCCG    |
| Mfn2       | Forward   | TGCACCGCCATATAGAGGAAG   |
| Mfn2       | Reverse   | TCTGCAGTGAACCTGGCAATG   |
| Opa1       | Forward   | GATGACACGCTCTCCAGTGAAG  |
| Opa1       | Reverse   | CTCGGGGGCTAACAGTACAACC  |
| XBP1       | Forward   | CCTGAGCCCGGAGGAGAA      |
| XBP1       | Reverse   | CTCGAGCAGTCTGCGCTG      |
| CHOP       | Forward   | CCACCACACCTGAAAGCAGAA   |
| CHOP       | Reverse   | AGGTGAAAGGCAGGGACTCA    |

## Permanent coronary artery ligation

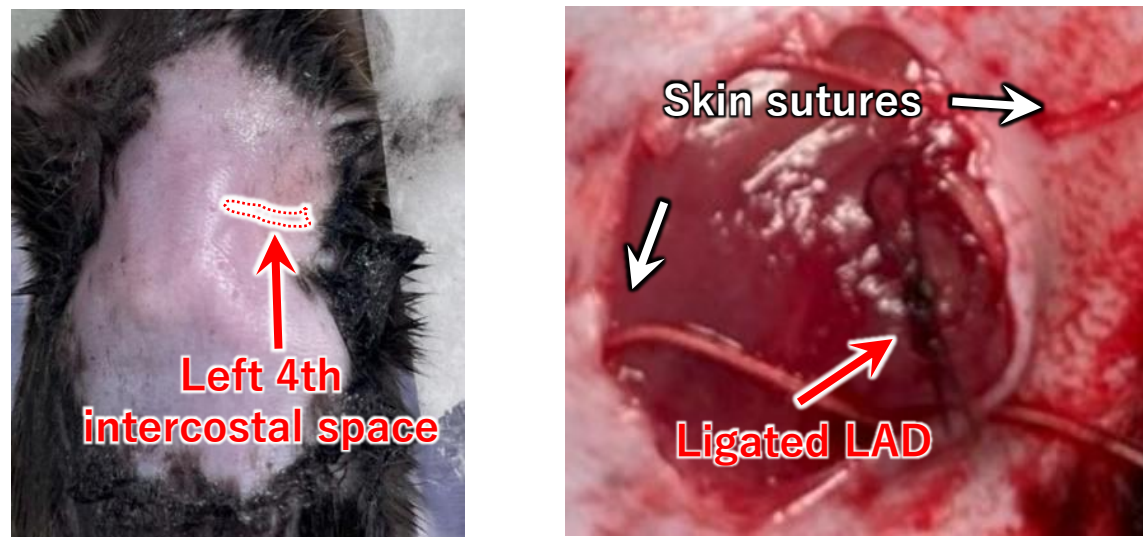

### Supplementary Figure 1. Procedure of permanent coronary artery ligation

1) Opened thoracic cavity, 2) Exposed heart, 3) Sutured left anterior descending artery, 4) Placed back heart, 5) Evacuated air, 6) Closed thoracic cavity, 7) Sutured skin

**(A)**

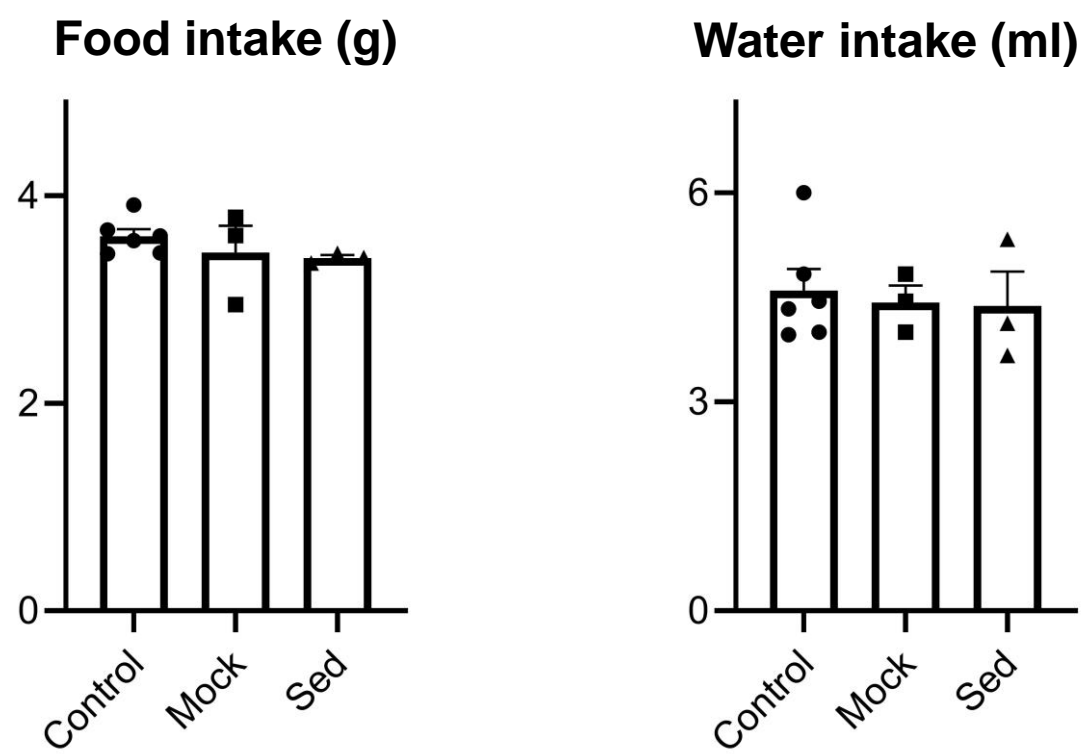

**(B)**

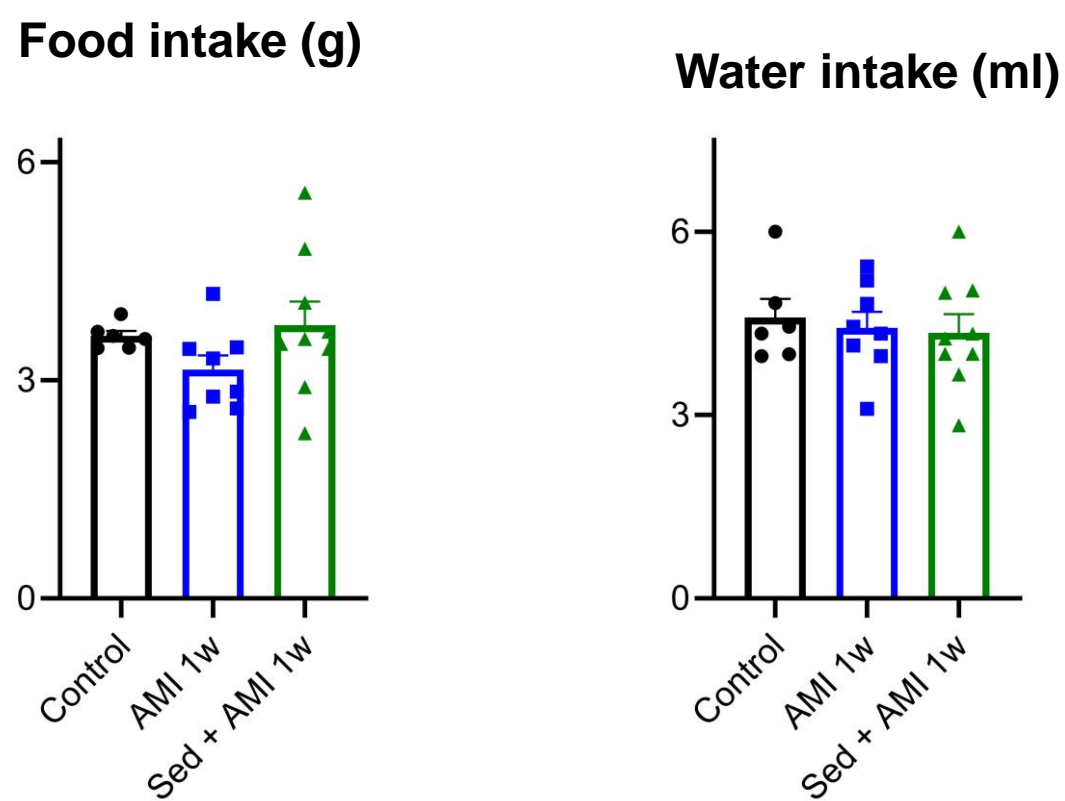

**(C)**

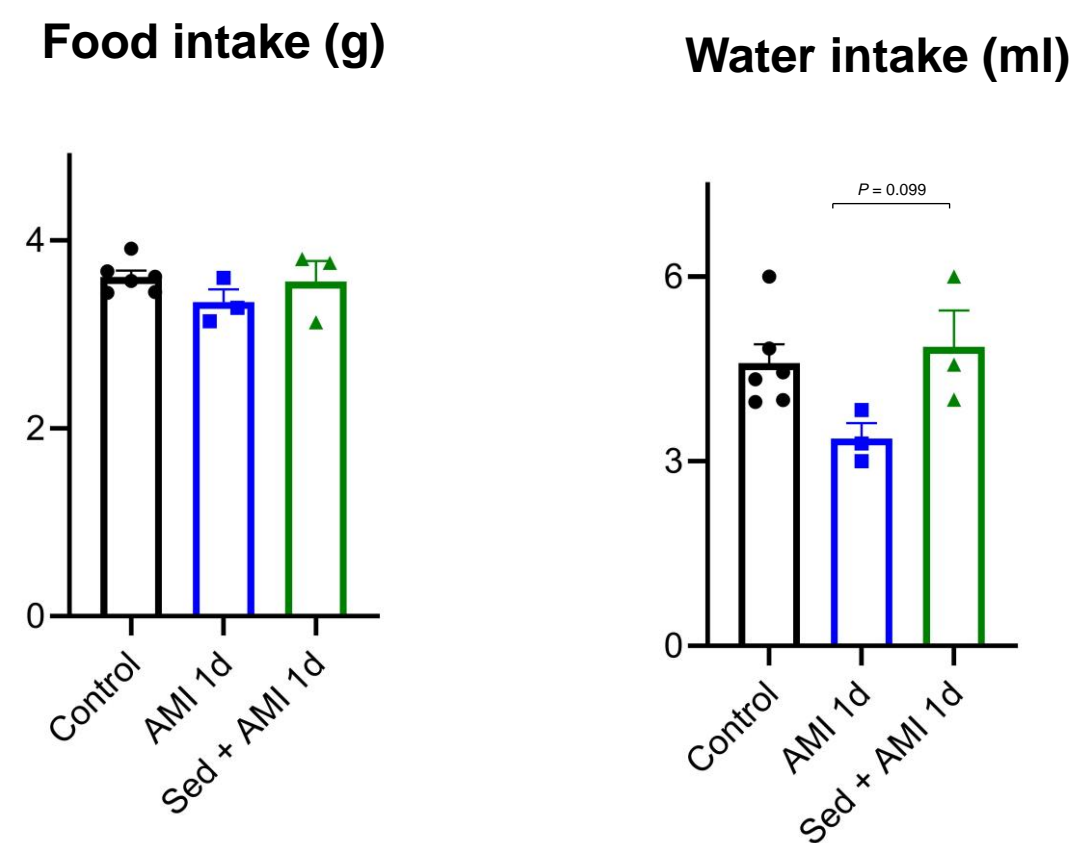

**Supplementary Figure 2. Food and water intakes are similar to each model.**

Food and water intakes in each mouse. Data represent the mean  $\pm$  SEM. Statistical analyses were performed by one-way ANOVA with Tukey's post-hoc test.  $n \geq 3$  for all groups.



**(A)**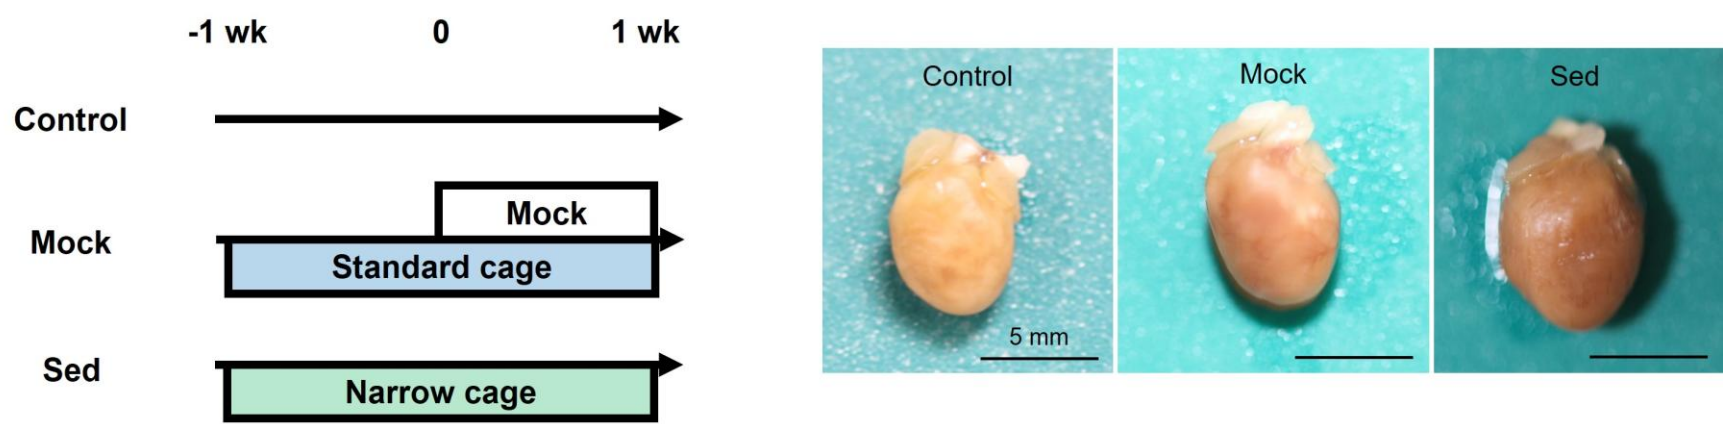**(B)**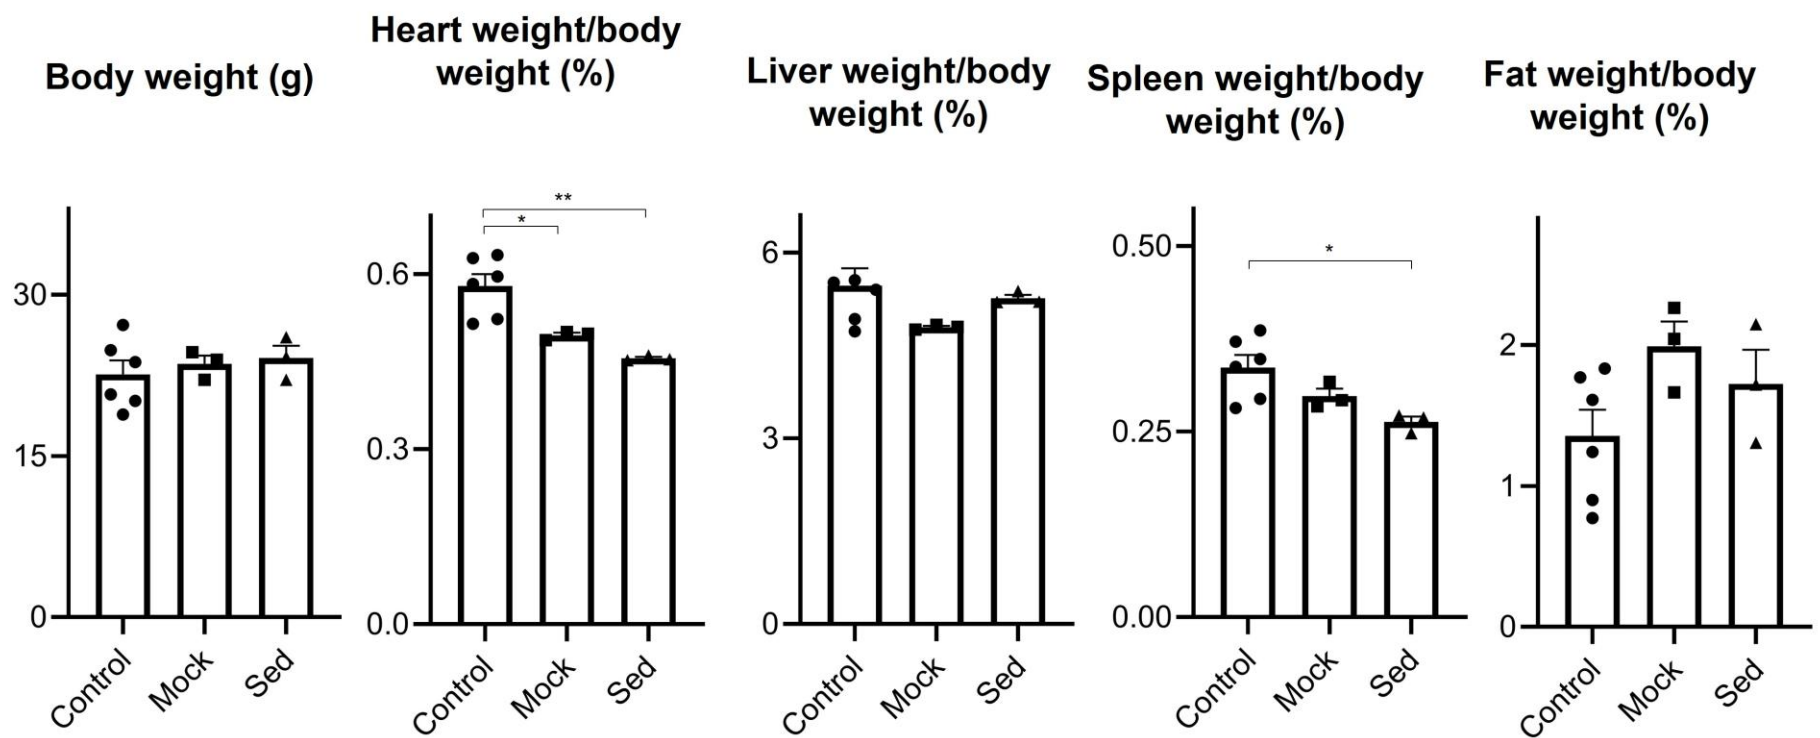**(C)**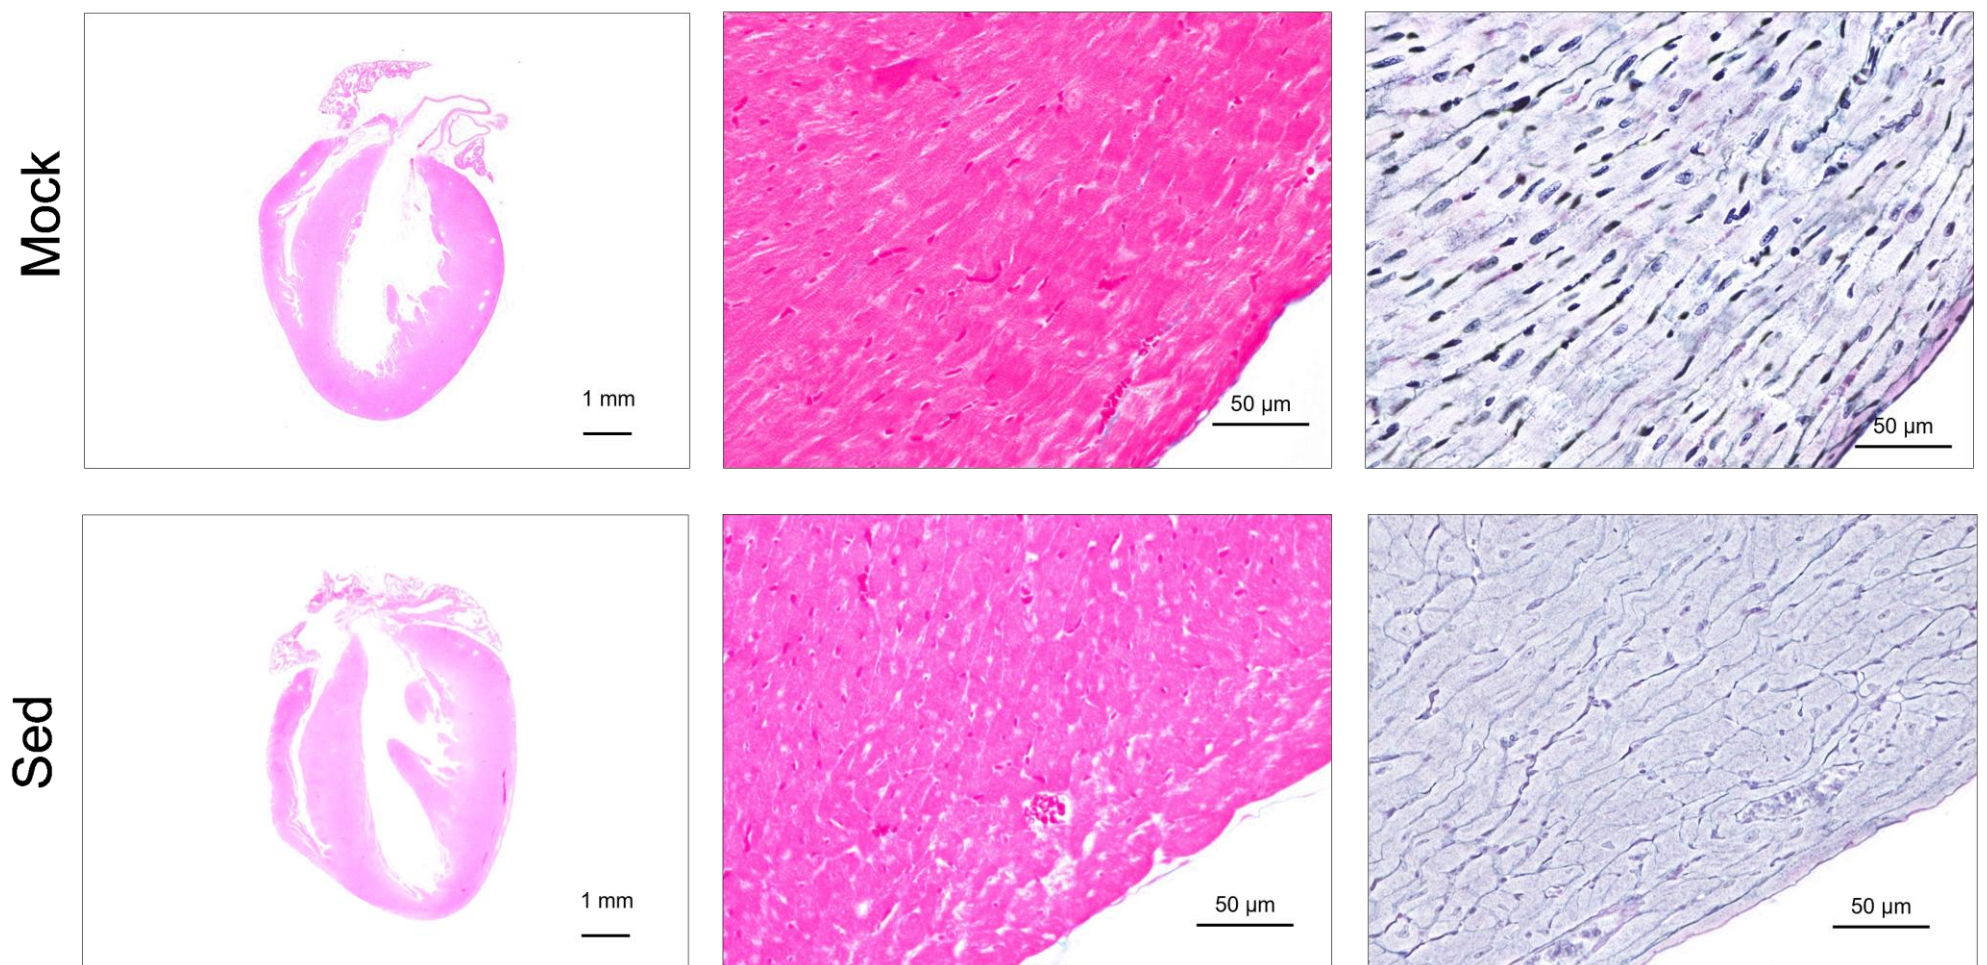

### Supplementary Figure 3. Mock operation and physical inactivity do not show any pathological changes by themselves

(A) Study protocol and macroscopic appearance in each mice. Scale bar = 5 mm. (B) Bodyweight, heart/body weight-, liver/body weight-, spleen/body weight-, and fat/body weight-ratios in each mouse. (C) Histological images of each mouse. Scale bar = 1 mm in H&E-, 50  $\mu$ m in Azan- and reticulin-stained sections. Data represent the mean  $\pm$  SEM. Statistical analyses were performed by one-way ANOVA with Tukey's post-hoc test. \* $P$ <.05, \*\* $P$ <.01.  $n \geq 3$  for all groups.



(A)

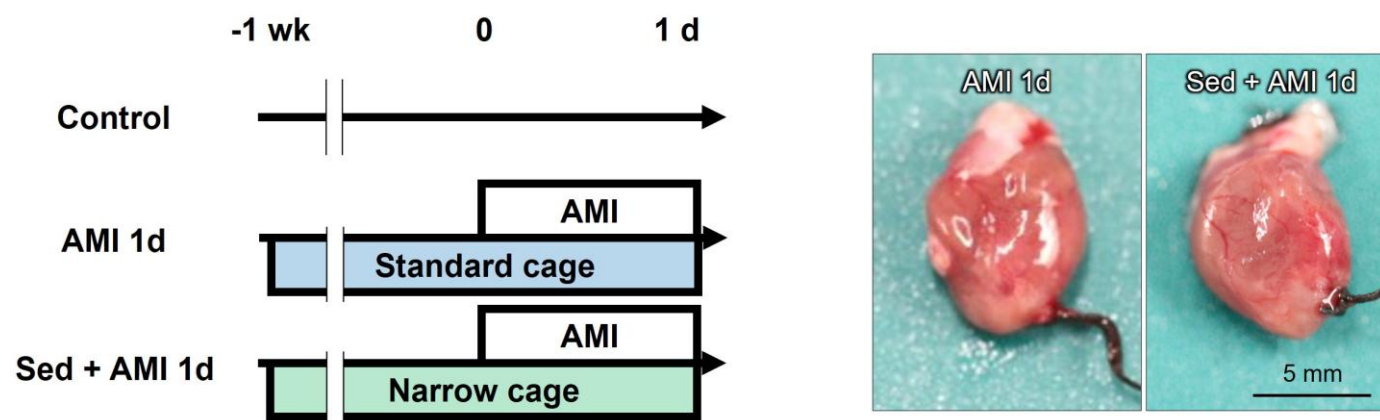

(B)

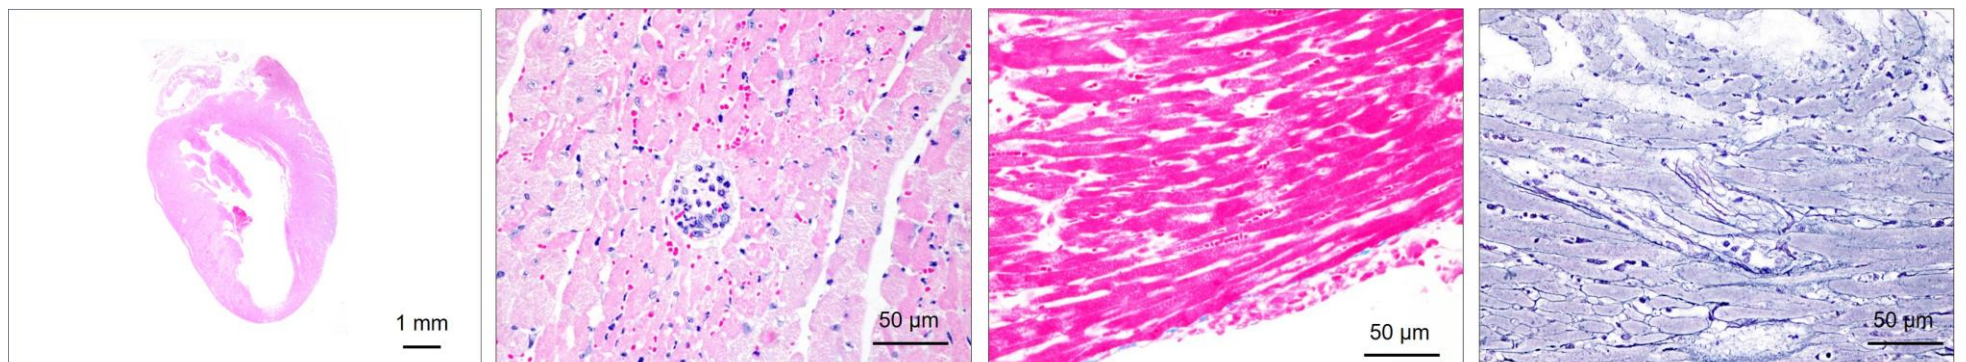

(C)

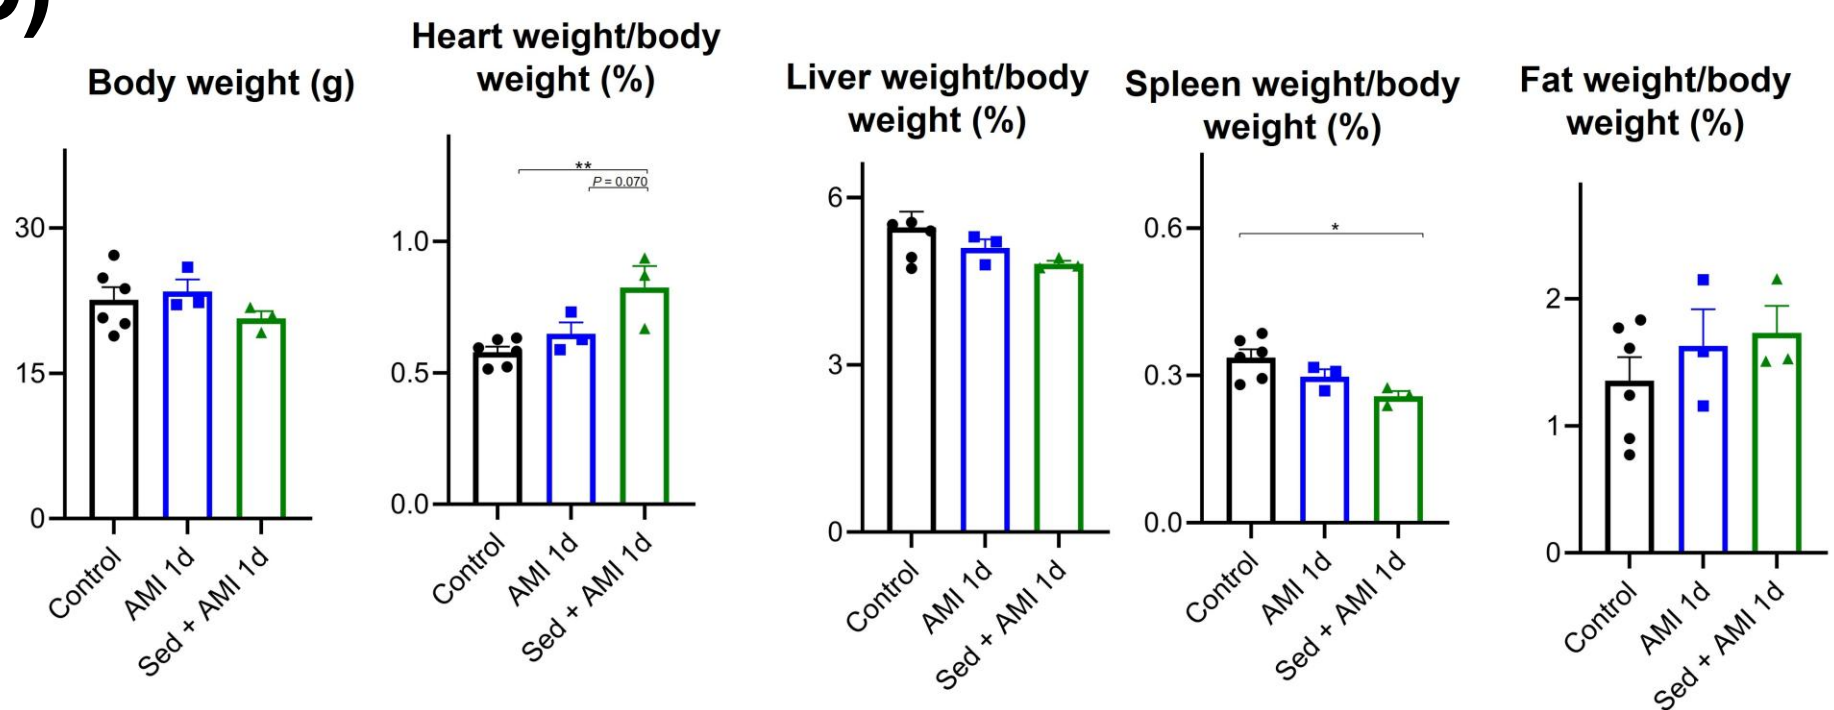

**Supplementary Figure 4. Physical inactivity aggravates coronary ligation-induced aberrant gene expression changes in cardiomyocytes**

(A) Study protocol and macroscopic appearance in each mice. Scale bar = 5 mm. (B) Histological images of hearts from mice at one day after coronary artery ligation. Scale bars = 1 mm in H&E-, 50  $\mu$ m in Azan- and reticulin-stained sections. (C) Bodyweight, heart/body weight-, liver/body weight-, spleen/body weight-, and fat/body weight-ratios in each mouse. Data represent the mean  $\pm$  SEM. Statistical analyses were performed by unpaired two-tailed Student's t-test or one-way ANOVA with Tukey's post-hoc test where appropriate. \* $P < .05$ , \*\* $P < .01$ , \*\*\* $P < .001$ , # $P < .05$ , ## $P < .01$ .  $n \geq 3$  for all groups.

## Proposed mechanisms underlying excessive mitochondrial fission in sedentary lifestyle-associated myocardial infarction.

### Detrimental effects

Mitochondrial fission ↑  
 Malformed mitochondria ↑  
 Mitochondrial fraction ↓  
 Endoplasmic reticulum stress ↑  
 Cardiomyocyte injury ↑  
 Pathological cardiomyocyte remodeling ↑  
 Pathological macrophage polarization ↑  
 Inflammatory cytokine production ↑  
 Pathological fibroblast activation ↑

### Compensatory effects

Mitochondrial fusion ↑  
 Mitochondrial biogenesis ↑

AMI

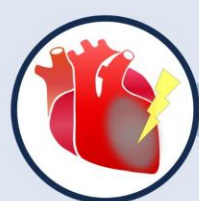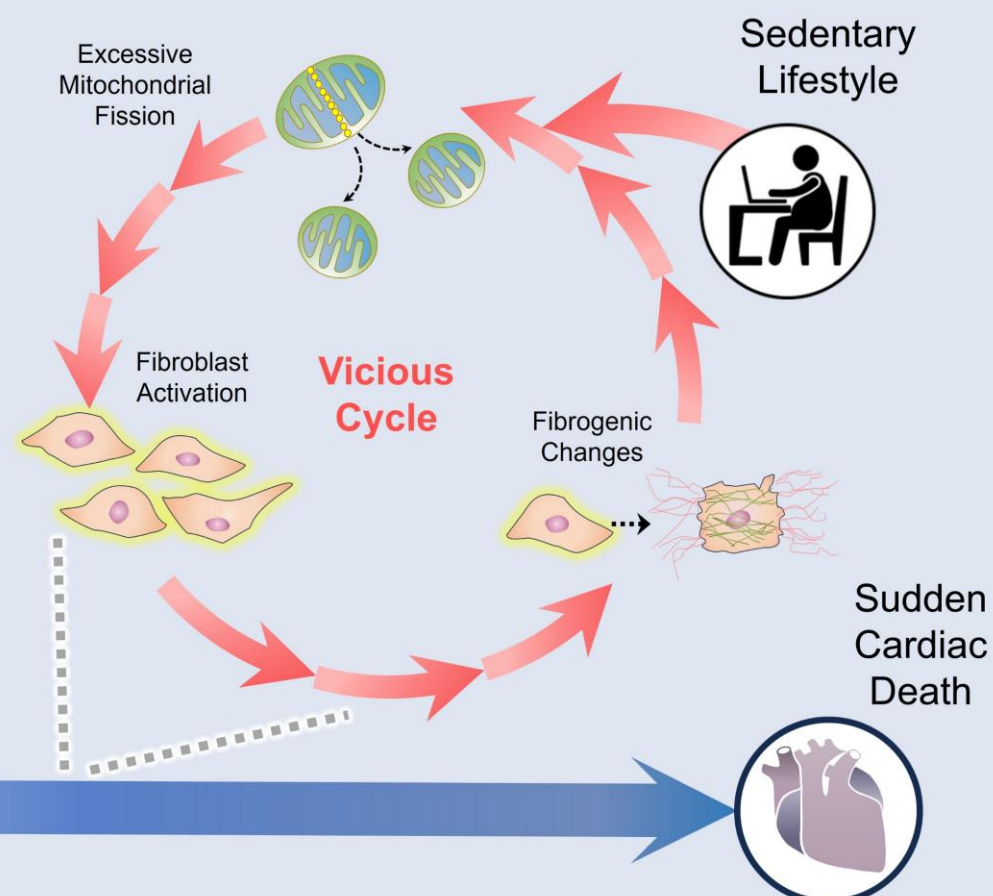

## Supplementary Figure 5. Proposed mechanisms underlying excessive mitochondrial fission in sedentary lifestyle-associated myocardial infarction

Excessive mitochondrial fission in cardiomyocytes enhances fibroblast activation and subsequent extensive fibrogenic changes in coronary artery disease, and eventually leads to sudden cardiac death. Sedentary lifestyle further aggravates the excessive mitochondrial fission-mediated myocardial infarction. Mitochondrial fission could have a pivotal role for progression of sedentary lifestyle-associated myocardial infarction.
